# Supplementary material for: Spatiotemporal distribution and fluctuation of radiocesium in Tokyo Bay in the five years following the Fukushima Daiichi Nuclear Power Plant (FDNPP) accident
Source: PLoS One. 2018 Mar 1;13(3):e0193414. doi: 10.1371/journal.pone.0193414 (PMC5832246; doi:10.1371/journal.pone.0193414)
Supplement: S4 Table — Corrected values were corrected for radioactive decay on March 16, 2011. The background concentration of heavy metal was assumed to be Zn 100 mg⋅kg-1, Hg 40 μg⋅kg-1, and Pb 10 mg⋅kg-1. (XLSX) [file pone.0193414.s009.xlsx]

## Sheet: Sheet1
2011-03-16
	S4 Table. Radiocesium activity, anthropogenic heavy metal concentration, and particle size in the soil collected around Kashiwa City. Corrected values were corrected for radioactive decay on March 16, 2011. The background concentration of heavy metal was assumed to be Zn 100 mg･kg-1, Hg 40 μg･kg-1, and Pb 10 mg･kg-1.
	Site	Sample Name	Sampling Date	Radiocesium Activity, Bqkg-1																			134Cs/137Cs Ratio			Particle Size, ×-6m	Anthropogenic
				Detected										Corrected													Zn, mg･kg-1	Hg, μg･kg-1	Pb, mg･kg-1
				134Cs			137Cs			134+137Cs				134Cs			137Cs			134+137Cs
	Kashiwa City Surface	K1	2011-05-19	5020	±	29.1	5310	±	30.77	10330	±	42.3509		5330	±	30.8681	5330	±	30.8945	10660	±	43.6728	1	±	0.00819376	81.292	1560	86.1	128
	Kashiwa City Road sludge	K2	2011-06-11	31400	±	97.45	33700	±	101.13	65100	±	140.441		33900	±	105.586	33900	±	101.687	67800	±	146.59	1	±	0.00432418	80.435	479.6	16.3	62.31
	Kashiwa City Road side	K3	2011-06-11	16200	±	59.9	17600	±	65.15	33800	±	88.5016		17600	±	64.9009	17700	±	65.5085	35300	±	92.2144	0.99435	±	0.00519502	47.954	269.3	nd	27.32
	Kashiwa City 0-5 cm	K4	2011-06-11	532.82	±	10.07	594.38	±	10.88	1130	±	14.825		577.304	±	10.9107	597.651	±	10.9399	1180	±	15.4507	0.965955	±	0.025415	97.483	45.3	33.9	15.98
	Chiba Prefecture Surface	C1	2011-05-19	998.91	±	12.19	1070	±	12.96	2070	±	17.7921		1060	±	12.9307	1070	±	13.0124	2130	±	18.3446	0.990654	±	0.0170641	57.907	183.5	21.1	38.88
	Chiba Prefecture Surface	C2	2011-05-19	3040	±	22.49	3180	±	23.53	6220	±	32.5494		3230	±	23.8565	3190	±	23.6252	6420	±	33.575	1.01254	±	0.0105906	20.418	54.4	53.8	20.52
	Chiba Prefecture 0-5 cm	C3	2011-06-11	83.45	±	4.07	105.7	±	4.49	189.15	±	6.06012		90.417	±	4.40979	106.282	±	4.51471	196.699	±	6.31101	0.85073	±	0.0550227	5.808	54.1	58.9	32.7
	Tokyo Surface	T1	2011-05-19	3280	±	23.33	3400	±	24.44	6680	±	33.7876		3480	±	24.7476	3410	±	24.5389	6890	±	34.8511	1.02053	±	0.0103248	54.585	152.5	31.2	38.12
	Sakagawa Embankment Surface	S1	2014-04-29	551.079	±	14.7138	1480	±	23.3855	2030	±	27.6293		1580	±	42.0763	1590	±	25.129	3170	±	49.009	0.993711	±	0.0307724	57.271	30.7	11.5	23.55
		S2	2014-04-29	271.152	±	6.29073	699.611	±	9.79455	970.763	±	11.6407		775.399	±	17.9893	751.772	±	10.5248	1530	±	20.8419	1.03143	±	0.0279485	73.806	nd	nd	nd
		S3	2014-04-29	390.634	±	10.2737	1020	±	16.1563	1410	±	19.1462		1120	±	29.3791	1100	±	17.3609	2220	±	34.1252	1.01818	±	0.0311699	59.166	31.97	12.6	15.3
		S4	2014-04-29	903.757	±	21.5998	2480	±	34.4478	3380	±	40.6596		2580	±	61.7678	2670	±	37.0161	5250	±	72.0101	0.966292	±	0.0267329	52.466	72.33	33.7	15.24
		S5	2014-04-29	167.919	±	4.43305	451.482	±	6.90768	619.401	±	8.2078		480.188	±	12.677	485.143	±	7.42269	965.331	±	14.6902	0.989786	±	0.0302015	21.764	26.64	37.3	17.37
		S6	2014-04-29	444.843	±	11.5659	1140	±	18.1488	1590	±	21.5209		1270	±	33.0744	1230	±	19.5019	2500	±	38.3959	1.03252	±	0.0314812	88.464	nd	70.5	32.44
