# Supplementary material for: Spatiotemporal distribution and fluctuation of radiocesium in Tokyo Bay in the five years following the Fukushima Daiichi Nuclear Power Plant (FDNPP) accident
Source: PLoS One. 2018 Mar 1;13(3):e0193414. doi: 10.1371/journal.pone.0193414 (PMC5832246; doi:10.1371/journal.pone.0193414)
Supplement: S5 Table — Latitude and longitude of land sampling points were not measured. (XLSX) [file pone.0193414.s010.xlsx]

## Sheet: Sheet1
	S5 Table. Geographic coordinates of sampling points. Latitude and longitude of land sampling points were not measured.
	Site		Latitude	Longitude
	Edogawa River	E1	36°05′36.405″	139°46′39.691″
		E2	35°56′33.799″	139°50′44.999″
		E3	35°51′03.399″	139°53′36.300″
		E4	35°49′23.499″	139°53′21.599″
		E5	35°49′15.800″	139°53′23.600″
		E6	35°44′14.899″	139°53′59.899″
		E7	35°40′57.432″	139°53′59.240″
		E8	35°40′37.113″	139°53′09.592″
		E9	35°39′43.826″	139°53′13.142″
		E10	35°38′47.338″	139°53′01.798″
	Sakagawa River	S1	35°49′22.929″	139°53′40.299″
		S2	35°49′23.359″	139°53′58.599″
		S3	35°49′27.429″	139°54′13.479″
		S4	35°50′34.849″	139°55′05.929″
		S5	35°51′10.589″	139°55′56.749″
		S6	35°50′09.909″	139°54′43.749″
	Tokyo Bay	01	35°38′26.789″	139°50′38.871″
		02	35°37′57.489″	139°50′35.138″
		03	35°37′39.299″	139°52′15.749″
		04	35°36′58.881″	139°50′31.642″
		05	35°35′26.501″	139°50′45.459″
		06	35°36′25.214″	139°52′37.981″
		07	35°37′15.700″	139°57′56.099″
		08	35°35′24.899″	140°00′29.800″
		09	35°33′36.799″	140°03′05.799″
		10	35°35′48.500″	139°56′00.399″
		11	35°33′44.899″	139°58′06.600″
		12	35°31′47.700″	140°00′53.600″
		13	35°34′30.892″	139°52′58.641″
		14	35°32′09.600″	139°55′59.699″
		15	35°29′53.999″	139°58′39.200″
		16	35°32′50.283″	139°50′00.419″
		17	35°30′27.100″	139°53′20.600″
		18	35°28′13.400″	139°56′34.400″
		19	35°30′05.608″	139°48′22.582″
		20	35°28′34.467″	139°50′29.810″
		21	35°26′41.600″	139°53′15.799″
		22	35°28′18.476″	139°46′18.832″
		23	35°26′26.800″	139°48′35.700″
		24	35°25′29.999″	139°51′11.499″
		30	35°27′44.456″	139°52′00.357″
		32	35°36′43.218″	139°54′26.431″
		33	35°38′11.813″	139°50′35.595″
		34	35°35′50.002″	139°49′47.297″
		35	35°34′22.105″	139°50′42.302″
		36	35°35′41.600″	139°52′30.899″
		38	35°35′51.788″	139°51′43.811″
		39	35°38′43.299″	139°45′59.299″
		40	35°38′10.200″	139°45′53.300″
		41	35°37′37.700″	139°45′52.499″
		42	35°37′02.300″	139°46′01.400″
		43	35°36′35.499″	139°46′22.699″
		44	35°35′55.600″	139°46′44.000″
		45	35°36′15.145″	139°47′35.451″
		46	35°36′43.999″	139°48′00.500″
		47	35°37′12.500″	139°48′26.399″
		49	35°36′43.491″	139°49′00.530″
		50	35°36′12.300″	139°49′34.100″
		52	35°33′31.799″	139°50′48.999″
		53	35°33′52.999″	139°50′19.399″
		54	35°34′55.142″	139°49′55.894″
		55	35°34′33.600″	139°49′11.700″
		56	35°34′43.700″	139°48′28.100″
		57	35°35′15.525″	139°47′39.757″
		58	35°34′18.530″	139°47′40.596″
		59	35°33′55.688″	139°47′57.062″
		60	35°33′51.343″	139°48′36.914″
		61	35°33′24.440″	139°48′58.226″
		62	35°32′51.172″	139°49′22.623″
		64	35°37′40.796″	139°50′32.953″
		65	35°37′23.033″	139°50′32.517″
		66	35°36′14.976″	139°50′33.835″
		67	35°35′04.099″	139°51′37.400″
		68	35°34′31.900″	139°52′10.400″
		69	35°34′57.399″	139°52′52.299″
		72	35°36′25.899″	139°51′33.000″
		76	35°36′07.700″	139°53′29.000″
		79	35°37′03.705″	139°55′00.242″
		80	35°31′00.037″	139°50′58.423″
		81	35°37′27.699″	139°52′19.899″
		82	35°37′09.642″	139°53′11.342″
		A	35°37′55.286″	139°56′38.738″
		A3	35°38′57.501″	139°50′43.900″
		B	35°37′29.654″	139°55′45.404″
		C	35°36′38.599″	139°52′11.200″
		D	35°36′41.699″	139°50′33.899″
		E	35°37′19.759″	139°51′16.779″
		E	35°28′55.642″	139°51′59.032″
		F	35°37′15.600″	139°52′49.800″
		G	35°36′44.079″	139°50′38.249″
		H	35°35′01.093″	139°54′26.870″
		J	35°33′16.039″	139°53′18.099″
		K	35°31′36.949″	139°51′46.929″
		M	35°36′13.899″	139°48′44.799″
